# Supplementary material for: A theoretical study on the homolytic dissociation energies of H–N+ bonds
Source: Royal Society of Chemistry journal article supplement (doi:10.1039/b204417j), 2002-01-01
Supplement: b204417j.doc [file b204417j.doc]

**Supplementary data**

**RMP2 Input Files for H3N+-Ph-COCH3 and H3N+-Ph-CONH2 Cases.**

H3N+-Ph-COCH3

1. ground

%rwf=d1,2000mb,d2,2000mb,d3,2000mb,d4,2000mb,d5,2000mb,d6,2000mb,d7,2000mb,d8,-1

%nosave

#p rmp2/6-311++G**

sp

1 1

C -1.235512 0.040706 -0.017167

C -1.254373 0.065267 1.372889

C -0.031630 0.036131 2.038087

C 1.191034 -0.015712 1.384100

C 1.185818 -0.039595 -0.013023

C -0.021499 -0.011689 -0.719943

N -0.040591 0.062316 3.536533

C -0.097277 -0.035329 -2.238334

O -1.193159 -0.008002 -2.763848

C 1.183993 -0.091622 -3.037778

H 2.131551 -0.037542 1.929537

H 2.134100 -0.080113 -0.537600

H -2.158200 0.061503 -0.587463

H -2.197762 0.105860 1.911946

H -0.545852 -0.742949 3.931562

H 0.915513 0.035840 3.912822

H 1.761433 -0.992444 -2.795929

H 0.933920 -0.101615 -4.099387

H 1.820132 0.776745 -2.826414

H -0.488748 0.913583 3.903000

1. radical

%rwf=d1,2000mb,d2,2000mb,d3,2000mb,d4,2000mb,d5,2000mb,d6,2000mb,d7,2000mb,d8,-1

%nosave

#p romp2/6-311++G**

sp

1 2

C -1.253317 0.004318 0.050579

C -1.276356 -0.014973 1.419147

C -0.036800 -0.030860 2.143663

C 1.211480 -0.026435 1.430266

C 1.205972 -0.006488 0.057094

C -0.019080 0.010416 -0.660577

N -0.039921 -0.049470 3.478025

C -0.091345 0.030654 -2.173981

O -1.198747 0.024466 -2.682932

C 1.182599 0.054720 -2.981158

H 2.144224 -0.038786 1.986902

H 2.149185 -0.003219 -0.478051

H -2.169586 0.015886 -0.530036

H -2.214971 -0.018299 1.966088

H -0.906302 -0.053546 4.008291

H 0.821743 -0.060952 4.015484

H 1.796137 -0.831823 -2.778364

H 0.924157 0.073867 -4.040625

H 1.785926 0.939319 -2.742601

H3N+-Ph-CONH2

1. ground

%rwf=e1,2000mb,e2,2000mb,e3,2000mb,e4,2000mb,e5,2000mb,e6,2000mb,e7,2000mb,e8,-1

%nosave

#p rmp2/6-311++G**

sp

1 1

C -1.210937 0.020366 -0.033811

C -1.229992 0.053395 1.356590

C -0.008140 0.049182 2.023235

C 1.215442 0.014852 1.369429

C 1.211170 -0.028094 -0.027039

C 0.003432 -0.033023 -0.732908

N -0.018484 0.108025 3.520422

C -0.090881 -0.022167 -2.246448

O -1.100724 0.400794 -2.785997

N 1.006135 -0.458993 -2.930096

H 2.156527 0.030767 1.914029

H 2.160324 -0.023622 -0.552785

H -2.132853 0.047551 -0.604537

H -2.174550 0.088477 1.893839

H -0.575454 -0.654330 3.930139

H 0.932902 0.027884 3.900901

H 1.686588 -1.076091 -2.510619

H 0.909885 -0.511369 -3.937023

H -0.411700 0.994087 3.867452

1. radical

%rwf=e1,2000mb,e2,2000mb,e3,2000mb,e4,2000mb,e5,2000mb,e6,2000mb,e7,2000mb,e8,-1

%nosave

#p romp2/6-311++G**

sp

1 2

C -1.230959 -0.087392 0.016356

C -1.260215 -0.122655 1.385612

C -0.033658 -0.049835 2.120867

C 1.213855 0.059677 1.418688

C 1.221778 0.084484 0.044801

C 0.008234 -0.025320 -0.679739

N -0.045122 -0.074642 3.458331

C -0.045220 0.082146 -2.174865

O -0.935461 0.799612 -2.627410

N 0.904231 -0.529000 -2.910361

H 2.139893 0.126080 1.982569

H 2.161662 0.191208 -0.487542

H -2.148508 -0.110826 -0.561067

H -2.201719 -0.197670 1.921714

H -0.912583 -0.136891 3.980963

H 0.809951 -0.017840 4.001201

H 1.512695 -1.238434 -2.526108

H 0.865641 -0.433665 -3.918558

**The geometry of all the optimized species.**

Protonated Amines

Ground

1. NH4+

Charge = 1 Multiplicity = 1

N,0,0.000000167,-0.0000008987,0.0000024609

H,0,0.0000063898,-0.0005230858,1.0294559848

H,0,0.9705387181,0.0001367052,-0.3431593902

H,0,-0.4853124566,-0.8403205623,-0.3435707325

H,0,-0.4852338203,0.8407132341,-0.3427430886

1. (CH3)NH3+

Charge = 1 Multiplicity = 1

N,0,0.3359580024,-0.5818945544,0.2375670474

H,0,0.3549294944,-0.6147162989,1.2649989401

H,0,1.3109401503,-0.6147647941,-0.0870983932

H,0,-0.1231128191,-1.44268842,-0.0870436047

C,0,-0.3793168615,0.6569905269,-0.2682217646

H,0,0.1507858542,1.5323488151,0.1066306426

H,0,-0.3669098972,0.6355320463,-1.3577697743

H,0,-1.4024376307,0.635607371,0.1066434454

1. (CH3)2NH2+

Charge = 1 Multiplicity = 1

N,0,0.4421736612,-0.0000041274,0.3126628677

H,0,0.4768420808,0.0000034361,1.3391693058

H,0,1.421528243,-0.0000211245,0.0031763065

C,0,-0.2260445373,-1.2691693749,-0.1598140433

C,0,-0.2260071025,1.2691736014,-0.1598335849

H,0,0.3279371312,2.123289432,0.2318240875

H,0,-0.2173525135,1.2758960206,-1.2502392942

H,0,-1.2511537092,1.2759402838,0.2118292812

H,0,-1.2512013765,-1.2758846838,0.2118216427

H,0,-0.2173611044,-1.2759242861,-1.2502192903

H,0,0.327855473,-2.1232955447,0.2318836363

1. (CH3)3NH+

Charge = 1 Multiplicity = 1

N,0,0.0000367466,0.0000199582,0.3399526751

H,0,0.0001344215,0.0000486367,1.366168709

C,0,1.4412072168,-0.0000005345,-0.1040175443

C,0,-0.7206406815,-1.2481276067,-0.1035211242

C,0,-0.720655831,1.2480787457,-0.1035198099

H,0,-0.1898987501,2.1184453048,0.2846647801

H,0,-0.7322535128,1.2689602985,-1.1944120176

H,0,-1.739993581,1.2228399628,0.2841431991

H,0,1.4649304833,0.0006689458,-1.1949568261

H,0,1.9295921153,0.8949234151,0.2839951788

H,0,1.9298066192,-0.8952840833,0.2829167996

H,0,-1.74049393,-1.2221949455,0.2827179619

H,0,-0.7308734482,-1.2698077564,-1.1944350122

H,0,-0.1906718693,-2.1184431129,0.2858793724

1. *s*-BuNH3+

Charge = 1 Multiplicity = 1

C,0,-0.0393049192,-0.4801266463,0.2303643073

N,0,0.0447079033,-0.507831466,1.7759184184

H,0,1.0192279861,-0.4940859892,2.1010084896

H,0,-0.4077488373,-1.343230452,2.1669907074

H,0,-0.4249263925,0.3135904088,2.1777914184

H,0,0.4892216825,-1.3887482792,-0.0763117954

C,0,-1.5110751532,-0.5569441862,-0.1554572346

C,0,0.7129466185,0.7633470403,-0.2539048179

H,0,-1.5944330813,-0.6258815281,-1.2428337447

H,0,-2.0008832331,-1.4442859212,0.2611571699

H,0,-2.0596071153,0.3373884097,0.1631814211

C,0,0.8497674711,0.8152556889,-1.7818120518

H,0,0.1935824443,1.6636775482,0.1035455405

H,0,1.717601745,0.7714425672,0.1920023566

H,0,1.4545391453,1.6803916682,-2.0658696957

H,0,1.3468738315,-0.08024013,-2.1703088985

H,0,-0.1204076015,0.9156105789,-2.2769231165

1. *t-*BuNH3+

Charge = 1 Multiplicity = 1

C,0,-0.000024869,0.0000664806,-0.0941948057

N,0,0.0000466926,0.0000595512,1.4663925846

H,0,0.9576580207,0.0047601791,1.838404878

H,0,-0.474551236,-0.8316667902,1.8385164419

H,0,-0.4829794375,0.8268457359,1.8385627506

C,0,0.7343898325,-1.2732597761,-0.520475733

C,0,-1.4697747966,0.0005055444,-0.5205847596

C,0,0.7353366011,1.2726936697,-0.5206918948

H,0,-1.5216164112,0.0009638699,-1.6128821207

H,0,-1.9990701809,-0.8920408682,-0.1679362589

H,0,-1.9992182658,0.8927585129,-0.1673628466

H,0,0.7608355906,1.3177011221,-1.6130248111

H,0,0.227610854,2.177524512,-0.1675695276

H,0,1.7729816079,1.2845516015,-0.1680818439

H,0,0.7607242638,-1.3183134691,-1.6127672964

H,0,1.7717951401,-1.2856936939,-0.1672243122

H,0,0.2259425981,-2.1778430822,-0.1676999861

1. PhNH­3+

Charge = 1 Multiplicity = 1

C,0,1.4468982755,-0.9513618296,0.8311738275

C,0,1.4464565707,0.4453672795,0.8291805015

C,0,0.4011317105,1.1464838721,0.2251964904

C,0,-0.6188925762,0.409598486,-0.364678894

C,0,-0.6496521404,-0.9797957117,-0.3795484995

C,0,0.4050071873,-1.6615596608,0.23000517

N,0,-1.7590088757,1.1516994435,-0.9935247946

H,0,-1.4627092294,-1.5281636705,-0.8490395372

H,0,0.4092538959,-2.7465119123,0.2291107427

H,0,2.2642948689,-1.4889249952,1.3008721915

H,0,2.2586270416,0.9952091684,1.2930913259

H,0,0.3964658336,2.2337727041,0.2210071565

H,0,-1.4581267126,2.0677755109,-1.3508260294

H,0,-2.1526987337,0.6316511633,-1.788600917

H,0,-2.5277389992,1.3209013138,-0.3289129466

8. PhNMe3+

Charge = 1 Multiplicity = 1

C,0,-2.1163283062,1.064689892,0.1832641599

C,0,-2.2785401401,0.2706875036,1.3192866834

C,0,-1.268872112,-0.6116770704,1.7116521693

C,0,-0.0892383056,-0.7081591344,0.9727184126

C,0,0.0501835774,0.0942651225,-0.157451285

C,0,-0.9419971236,0.9800560931,-0.5669920169

N,0,1.2992448679,0.0185774984,-0.9737092379

H,0,-0.8154645321,1.5993170742,-1.4529635058

H,0,-2.8985920619,1.7509959868,-0.12413618

H,0,-3.1925461031,0.3386915539,1.9004976265

H,0,-1.3951649299,-1.2290289616,2.5950976655

H,0,0.6896449806,-1.3969038497,1.2857511733

C,0,2.5274157053,0.4675411466,-0.2140284226

C,0,1.499034947,-1.3336499738,-1.6206678674

H,0,1.1717418295,0.6890572857,-1.739009181

H,0,2.3703475725,-1.2815580952,-2.2758449715

H,0,1.6604749277,-2.0734630343,-0.8373153

H,0,0.6010120596,-1.5781989625,-2.1882368966

H,0,3.3760887506,0.4817033062,-0.9001094569

H,0,2.3370024169,1.4627499456,0.1880656993

H,0,2.71079156,-0.2359262145,0.5974769938

1. Pyridine

Charge = 1 Multiplicity = 1

N,0,-1.1340830661,0.,-0.6547631635

C,0,-1.172923476,0.,0.6976020668

C,0,0.0149723712,0.,1.4080600227

C,0,1.2262387133,0.,0.7079692512

C,0,1.2269019354,0.,-0.6910635575

C,0,0.0176793736,0.,-1.3645825603

H,0,-2.1541110044,0.,1.1573851989

H,0,-0.0123018199,0.,2.4917610619

H,0,2.166451273,0.,1.2508012257

H,0,2.1517774699,0.,-1.2565342195

H,0,-0.074730518,0.,-2.4442074518

H,0,-2.0157174421,0.,-1.1637750078

Radical

1. NH3+·

Charge = 1 Multiplicity = 2

N,0,-0.0000075797,0.0000127072,0.0000089214

H,0,-0.1753583052,0.3033017104,0.9676395795

H,0,0.8595764523,0.2937615718,-0.483594984

H,0,-0.6841650894,-0.5971522329,-0.4841070454

1. (CH3)NH2+·

Charge = 1 Multiplicity = 2

C,0,-0.0619167228,0.1072415685,-0.6975540842

N,0,0.0514521878,-0.0891203934,0.7043950475

H,0,0.859416199,0.252594591,1.2341120783

H,0,-0.6484926629,-0.6179302828,1.2341236242

H,0,0.4363878634,-0.755789348,-1.2005882878

H,0,-1.1114458957,0.0926384944,-1.006548995

H,0,0.4754695179,1.0088798884,-1.0065392467

1. (CH3)2NH+·

Charge = 1 Multiplicity = 2

C,0,-0.4287435356,-0.035066743,-1.2236985595

N,0,-0.3885111122,0.0713642612,0.2098608622

C,0,0.7888887567,-0.0310915688,1.0291658884

H,0,-1.2778853323,0.2347246892,0.6902511842

H,0,1.0140471206,0.9675385199,1.444940788

H,0,0.5834568224,-0.6909645541,1.8825199439

H,0,1.6351155889,-0.3855119477,0.4406210816

H,0,0.5797727754,-0.0217394692,-1.6369852814

H,0,-0.9302317872,-0.982794758,-1.4904347926

H,0,-1.0455687289,0.7761475622,-1.6327429326

1. (CH3)3N+·

N,0,0.0004019167,-0.0029449167,-0.0000190498

C,0,0.0134651707,-0.0013470007,1.4502682218

C,0,1.2468038927,0.0769055713,-0.7369686137

C,0,-1.2603914131,-0.0748204241,-0.7132505652

H,0,1.0594831626,0.0319004218,-1.809618961

H,0,1.7536985773,1.0173264058,-0.4782598174

H,0,1.9003235541,-0.7494021662,-0.4264378672

H,0,-2.0917972718,-0.1426340103,-0.0119362805

H,0,-1.3650464136,0.8194749355,-1.3435090421

H,0,-1.2467885985,-0.949874035,-1.3771171078

H,0,-0.5949642999,0.8385089293,1.8124589279

H,0,-0.4513561117,-0.9293362604,1.8114852047

H,0,1.0343680825,0.080221318,1.8227740345

1. *s*-BuNH2+·

Charge = 1 Multiplicity = 2

C,0,-0.6946281439,0.0501519203,-1.4751666496

C,0,-0.6436391831,0.008117429,0.0485839496

C,0,0.9170876194,0.0626495366,0.6174633995

C,0,1.6594864975,-1.2054295567,0.2186429996

N,0,-1.3045356132,1.0901202499,0.6468782077

H,0,-1.6331621415,1.0538733041,1.6118472524

H,0,-1.3584847092,1.9996756336,0.1863366464

H,0,-1.0345848415,-0.9208780338,0.4800357581

H,0,-0.15741128,-0.8047839053,-1.8889800516

H,0,-1.7320970834,-0.0036113606,-1.8188977004

H,0,-0.2361820451,0.9642521729,-1.8691472571

H,0,1.3604868547,0.9675204791,0.1932455786

H,0,0.8581134687,0.1663513464,1.7038599262

H,0,2.6642947778,-1.1292098036,0.6578006296

H,0,1.1905966272,-2.108544837,0.6204207262

H,0,1.780338926,-1.3084227206,-0.8618111573

1. *t-*BuNH2+·

Charge = 1 Multiplicity = 2

C,0,0.0445745644,0.0923948024,-1.5473844539

C,0,0.0010778856,0.0019518836,0.0669351356

C,0,1.4412027552,0.0161580558,0.6056823595

N,0,-0.6075498893,-1.2590005627,0.3112877081

C,0,-0.8842633082,1.1383143948,0.6053646888

H,0,-0.0584235271,-2.1202387092,0.3519055312

H,0,-1.6236697057,-1.3673395738,0.3373912446

H,0,-0.4529357942,2.0975301495,0.309308617

H,0,-1.9025826259,1.0888741819,0.2050142088

H,0,-0.9269293403,1.1016052444,1.6980598063

H,0,1.9225282974,0.9524193761,0.3132581484

H,0,1.4390269196,-0.0440514065,1.698178141

H,0,2.0373684566,-0.8094160584,0.2023022098

H,0,0.5112328912,1.0623736928,-1.7470403851

H,0,0.6548080855,-0.7100718159,-1.9652851979

H,0,-0.9631258139,0.0684040384,-1.965692662

1. PhNH­2+·

Charge = 1 Multiplicity = 2

C,0,-1.2352583202,0.0380583693,-1.1489624086

C,0,-1.2445454222,-0.008120607,0.2242809307

C,0,0.0034416057,-0.0315455515,0.9352622205

C,0,1.2461611865,-0.0069658502,0.2151678175

C,0,1.2267693854,0.0393544093,-1.1579644981

C,0,-0.0068128608,0.0623667787,-1.8516173747

N,0,0.0083536894,-0.0760226811,2.2709237767

H,0,2.1825725367,-0.0253470343,0.7653119298

H,0,2.1580267063,0.0581985169,-1.7142979514

H,0,-0.0107976397,0.0990759987,-2.9365521574

H,0,-2.1705846225,0.0562002994,-1.6984510691

H,0,-2.1768867692,-0.0280571137,0.781239653

H,0,-0.8536605568,-0.0935382898,2.8078332668

H,0,0.8743210736,-0.0932589008,2.8014497676

1. PhNMe2+·

Charge = 1 Multiplicity = 2

C,0,-0.1445692655,0.0018176086,-0.0892211011

C,0,-0.1694436236,-0.0718185025,1.3424080272

C,0,1.0112275263,-0.0916680891,2.0545180096

C,0,2.2491813201,-0.0271223328,1.3873542436

C,0,2.2910710564,0.0518678883,-0.017572827

C,0,1.124761809,0.0603656689,-0.7532007381

N,0,-1.3011280624,0.0156496315,-0.8025506679

C,0,-1.3243483196,-0.1317722896,-2.2652060638

C,0,-2.6159228057,0.1792180353,-0.1651859836

H,0,-1.1106791433,-0.1513723546,1.8713698535

H,0,0.9826901292,-0.1648997555,3.1367168

H,0,3.1729565865,-0.0383131435,1.9571257007

H,0,3.2465629728,0.1138905922,-0.5279863136

H,0,1.1766394748,0.1505893696,-1.8308022582

H,0,-3.2993682189,0.6158925474,-0.8945816581

H,0,-3.0083488889,-0.7964895732,0.1461524671

H,0,-2.5501850661,0.845253998,0.6941542965

H,0,-2.2903536217,-0.5485081675,-2.5532457971

H,0,-1.2050859968,0.8472234925,-2.7450693131

H,0,-0.5386779748,-0.808142349,-2.599340503

1. Pyridine radical

Charge = 1 Multiplicity = 2

C,0,-1.2297205664,0.,-0.702310296

N,0,-1.124298745,0.,0.6067644447

C,0,-0.0879036776,0.,1.4134091261

C,0,1.1557676631,0.,0.7584895718

C,0,1.1825556017,0.,-0.6382046426

C,0,0.0003521359,0.,-1.3824272831

H,0,-0.231738681,0.,2.4909863102

H,0,2.0571404589,0.,1.3638735385

H,0,2.1387464533,0.,-1.1542441988

H,0,-0.0109460776,0.,-2.4681689739

H,0,-2.2094178793,0.,-1.1735366466

Protonated *para*-substituted anilines

Ground

1. H

Charge = 1 Multiplicity = 1

C,0,1.4468982755,-0.9513618296,0.8311738275

C,0,1.4464565707,0.4453672795,0.8291805015

C,0,0.4011317105,1.1464838721,0.2251964904

C,0,-0.6188925762,0.409598486,-0.364678894

C,0,-0.6496521404,-0.9797957117,-0.3795484995

C,0,0.4050071873,-1.6615596608,0.23000517

N,0,-1.7590088757,1.1516994435,-0.9935247946

H,0,-1.4627092294,-1.5281636705,-0.8490395372

H,0,0.4092538959,-2.7465119123,0.2291107427

H,0,2.2642948689,-1.4889249952,1.3008721915

H,0,2.2586270416,0.9952091684,1.2930913259

H,0,0.3964658336,2.2337727041,0.2210071565

H,0,-1.4581267126,2.0677755109,-1.3508260294

H,0,-2.1526987337,0.6316511633,-1.788600917

H,0,-2.5277389992,1.3209013138,-0.3289129466

1. CH3

Charge = 1 Multiplicity = 1

C,0,-1.2314435428,0.0058834025,-0.6846722395

C,0,-1.2575149771,0.0084730634,0.7188965319

C,0,-0.0350025398,0.0059198413,1.4086300171

C,0,1.1821686304,-0.0035383063,0.7293809408

C,0,1.1538545686,-0.0102930569,-0.6595405508

C,0,-0.0286581917,-0.0035707543,-1.3888661776

N,0,2.4543808029,0.0124964143,-1.4030216605

H,0,-0.0300659769,-0.0033850859,-2.4762933806

H,0,-2.1649879519,0.0093942762,-1.2392372279

C,0,-2.5664506664,-0.0124276832,1.4669831868

H,0,-0.0307762183,0.0094512264,2.4944553091

H,0,2.1184738488,-0.0033000431,1.2824514467

H,0,3.1998996,-0.4478036204,-0.8653765294

H,0,2.3806296596,-0.4814502861,-2.3015979402

H,0,2.7723371599,0.9707035467,-1.6067603001

H,0,-3.3599843924,0.4824556418,0.8998327579

H,0,-2.8881505427,-1.0458148462,1.6488718624

H,0,-2.4797604942,0.4795952524,2.4399353721

1. NO2

Charge = 1 Multiplicity = 1

C,0,-0.6494510167,-0.0140400915,-0.3731720156

C,0,-0.6805015097,-0.0034680985,1.0180167438

C,0,0.5264637174,0.0189342586,1.7152317177

C,0,1.707366047,0.0280033541,0.980104292

C,0,1.7466460234,0.0178961491,-0.4098179457

C,0,0.5358382772,-0.0045141526,-1.1012125537

N,0,3.0044702763,0.0765912286,1.7257177982

N,0,-1.9390016155,-0.0401864888,-1.1134341447

O,0,-2.9608087567,-0.0490779954,-0.4388448572

O,0,-1.8718342412,-0.0498223699,-2.3359681395

H,0,2.685489929,0.0260783594,-0.9574581829

H,0,0.5021169579,-0.016847891,-2.1839807008

H,0,-1.6327736292,-0.0152917995,1.534475652

H,0,0.5270250221,0.0276744328,2.8020531393

H,0,2.9551313795,-0.4560463859,2.6046341354

H,0,3.7712205276,-0.3270837338,1.1713434631

H,0,3.2764839376,1.0410182466,1.9665494619

1. CN

Charge = 1 Multiplicity = 1

C,0,-0.9979736811,-0.0059248167,-0.5709869356

C,0,-0.9981951384,-0.0009998764,0.8331802156

C,0,0.2088217618,0.005801609,1.5296264382

C,0,1.3896565509,0.0081014636,0.7975477168

C,0,1.4259582576,0.0030627627,-0.5933047922

C,0,0.2158927992,-0.0039172838,-1.2809972662

N,0,2.6902493929,0.015668278,1.5400628364

C,0,-2.2415732936,-0.0129338034,-1.2848023911

N,0,-3.2492911764,-0.0179911459,-1.8632548176

H,0,2.3639964712,0.0046908628,-1.1421244524

H,0,0.2076660045,-0.0077103501,-2.3653365167

H,0,-1.9375631632,-0.0025422367,1.3747808236

H,0,0.2081028182,0.0095501646,2.6167285212

H,0,2.5361565753,0.0226431192,2.5566182704

H,0,3.2614301365,-0.8141286167,1.3259621797

H,0,3.2579801039,0.8446168015,1.3141371296

1. NH2

Charge = 1 Multiplicity = 1

C,0,-1.2556957512,0.0231631902,-0.6832293127

C,0,-1.281171294,0.0492803062,0.7325386083

C,0,-0.0483351645,0.0227340031,1.4287863742

C,0,1.1545003547,-0.0273114106,0.742283124

C,0,1.1375909421,-0.0557222199,-0.6504064098

C,0,-0.0540496811,-0.0268854749,-1.3716333349

N,0,2.4338609368,-0.0745702231,-1.3914989484

H,0,-0.0604349769,-0.0452133118,-2.4591402383

H,0,-2.1886199766,0.0355058424,-1.2383269567

N,0,-2.4611045753,0.0745654379,1.4069703234

H,0,-0.0431478687,0.0347188603,2.5143495454

H,0,2.0884507691,-0.0459408255,1.2995180774

H,0,3.1665395209,-0.5475331042,-0.8475227714

H,0,2.3484356655,-0.5825632591,-2.2810258178

H,0,2.7842326706,0.8687117723,-1.61437572

H,0,-3.336900094,0.1855805858,0.9187974372

H,0,-2.4848866755,0.1852165714,2.4093925236

1. N(CH3)2

Charge = 1 Multiplicity = 1

C,0,-1.2202942626,-0.0827447855,-1.4181657393

C,0,-1.216253255,-0.011059802,-0.0346427294

C,0,0.0026530811,0.0382576426,0.7001550726

C,0,1.2159539518,0.0166280465,-0.0449363508

C,0,1.2095866252,-0.0550691156,-1.4285400582

C,0,-0.0078232653,-0.1004447088,-2.1025590427

N,0,0.0075102672,0.108043645,2.0610195895

C,0,1.2714065763,0.1642705746,2.7913798519

N,0,-0.0128215852,-0.2150122726,-3.5909953708

C,0,-1.2511965995,0.1333323239,2.8019993497

H,0,2.1705411475,0.0608387198,0.4621812879

H,0,2.1559035998,-0.0714806,-1.9649843619

H,0,-2.1705171241,-0.1206268892,-1.946478915

H,0,-2.1671325597,0.0116907956,0.4807860248

H,0,-0.8342601542,0.2493868869,-3.998480828

H,0,0.8168709267,0.2321092194,-4.0008294178

H,0,-1.0348952284,0.1844057886,3.8685725353

H,0,-1.8572358232,1.0089885007,2.5369121833

H,0,-1.8430941728,-0.7724519702,2.6197580477

H,0,1.0628431364,0.213737378,3.8595686688

H,0,1.8825296048,-0.7282075052,2.6068246236

H,0,1.854864354,1.052816506,2.5187110155

H,0,-0.0234355923,-1.1914474915,-3.9208525184

1. F

Charge = 1 Multiplicity = 1

C,0,-1.2234535616,0.0040270606,-0.6071418357

C,0,-1.2219031455,-0.0044319962,0.7844794551

C,0,-0.0001772725,-0.0089944476,1.4591671746

C,0,1.2211531009,-0.0050921384,0.7881418957

C,0,1.2228842174,0.0037116372,-0.6051058495

C,0,0.0013512532,0.0080209814,-1.2699864161

F,0,-0.0028371222,-0.017509182,2.7890669504

N,0,0.00090312,0.0169571927,-2.7665394785

H,0,-2.1661443974,0.0076394573,-1.1482062887

H,0,-2.1475759792,-0.0077427427,1.348963435

H,0,2.1466160946,-0.0090927065,1.3528405094

H,0,2.1672108552,0.0067095174,-1.1440421654

H,0,0.9607992959,0.023546018,-3.1339107392

H,0,-0.4666801297,-0.8118616511,-3.1594512347

H,0,-0.4741410309,0.8462378138,-3.1493462646

1. Cl

Charge = 1 Multiplicity = 1

C,0,-1.2194241683,0.005940246,-1.0503292774

C,0,-1.2181452781,-0.0017839163,0.3420336798

C,0,-0.0014697995,-0.0059344745,1.0353895184

C,0,1.2171564329,-0.0022341797,0.3498746061

C,0,1.2234991897,0.0059206658,-1.0441532949

C,0,0.0048144876,0.0097700255,-1.7113621889

Cl,0,-0.0075088825,-0.0156676131,2.7693110817

N,0,0.0067307735,0.0181638239,-3.2082156191

H,0,-2.1624270903,0.0090930127,-1.5909928283

H,0,-2.15474218,-0.0046591387,0.8881335893

H,0,2.1516913574,-0.0053544353,0.8993968992

H,0,2.1699309823,0.0089512287,-1.5795173744

H,0,0.9670157489,0.0245877031,-3.5747400611

H,0,-0.4610458309,-0.8108386431,-3.6006325811

H,0,-0.4684725859,0.8473527267,-3.5911449574

1. COCH3

Charge = 1 Multiplicity = 1

C,0,-1.2355123469,0.0407061108,-0.0171673643

C,0,-1.2543728182,0.0652670245,1.3728892926

C,0,-0.0316299726,0.0361308425,2.0380866806

C,0,1.1910338585,-0.0157116486,1.384099803

C,0,1.1858177642,-0.0395952573,-0.0130234331

C,0,-0.0214987668,-0.0116894857,-0.7199432435

N,0,-0.0405909919,0.0623157483,3.5365329784

C,0,-0.0972769841,-0.0353286242,-2.2383343801

O,0,-1.1931591455,-0.0080022133,-2.7638477541

C,0,1.1839932822,-0.0916223814,-3.0377780467

H,0,2.1315510697,-0.0375424129,1.9295374447

H,0,2.134100143,-0.0801130273,-0.5375999445

H,0,-2.1582003838,0.0615025365,-0.5874630169

H,0,-2.1977617713,0.1058603898,1.9119463593

H,0,-0.5458522746,-0.7429486498,3.9315616323

H,0,0.9155127772,0.0358401714,3.91282216

H,0,1.7614329128,-0.9924439,-2.7959288468

H,0,0.9339198035,-0.1016153821,-4.0993872647

H,0,1.8201319625,0.7767448163,-2.8264136779

H,0,-0.4887482306,0.9135834429,3.9030004869

1. OCH3

Charge = 1 Multiplicity = 1

C,0,-1.370253113,-0.0627786702,-1.059113023

C,0,-1.3564727612,-0.0470281386,0.3247738579

C,0,-0.1346314868,0.006314236,1.0300318607

C,0,1.077991908,0.0438178224,0.3200371413

C,0,1.066636342,0.028047358,-1.0743386947

C,0,-0.1505645902,-0.0246515322,-1.7377128747

O,0,-0.2426019028,0.0169669096,2.3654044927

C,0,0.9412339621,0.0698835216,3.171140293

N,0,-0.1620650261,-0.0416460227,-3.2323379851

H,0,2.0280242136,0.0849007141,0.8376008407

H,0,2.0094282978,0.0573613486,-1.6161014022

H,0,-2.317611093,-0.1039473754,-1.5910767166

H,0,-2.2802642775,-0.0753247743,0.8919165182

H,0,-0.6665732315,0.7640643929,-3.6274916418

H,0,0.7946057612,-0.0098337154,-3.6059328995

H,0,0.5894072906,0.0681218577,4.2020844124

H,0,1.5729597903,-0.8080247373,2.996119225

H,0,1.5060669934,0.9882748583,2.9763349264

H,0,-0.6044149056,-0.8914332695,-3.6092346713

1. CONH2

Charge = 1 Multiplicity = 1

C,0,-1.2109368527,0.0203660469,-0.0338112929

C,0,-1.2299919814,0.0533952971,1.3565901133

C,0,-0.0081399765,0.0491822841,2.0232351769

C,0,1.2154416301,0.0148516413,1.3694291136

C,0,1.2111698071,-0.0280941283,-0.02703851

C,0,0.0034324734,-0.0330230477,-0.7329076112

N,0,-0.0184843652,0.1080248036,3.5204218973

C,0,-0.0908809885,-0.0221666506,-2.2464480937

O,0,-1.1007239944,0.4007942377,-2.7859965149

N,0,1.0061354462,-0.4589931841,-2.9300957515

H,0,2.1565266328,0.0307672354,1.9140288745

H,0,2.1603244653,-0.0236217318,-0.5527849182

H,0,-2.1328525158,0.0475512257,-0.6045367174

H,0,-2.1745496211,0.088477254,1.8938385476

H,0,-0.5754543956,-0.6543296437,3.9301394431

H,0,0.9329018689,0.0278843803,3.9009005123

H,0,1.6865876777,-1.0760910863,-2.5106189213

H,0,0.909885232,-0.5113686673,-3.9370232057

H,0,-0.4116996249,0.9940871381,3.8674521076

1. CF3

Charge = 1 Multiplicity = 1

C,0,-1.2118317492,0.0617612006,0.2604544635

C,0,-1.2156669004,0.0911933891,1.6544768205

C,0,0.0096642661,0.0754934996,2.3097257236

C,0,1.2299369123,0.0378339854,1.6460916388

C,0,1.2152976177,0.0088026207,0.2520838197

C,0,-0.0009690281,0.0190455027,-0.4349185543

N,0,0.0160003479,0.1333543855,3.8068732237

C,0,-0.0083050649,-0.0724605618,-1.9495920402

F,0,-1.0869941959,0.5432987107,-2.4627764853

F,0,1.0943157295,0.492413133,-2.4703940275

F,0,-0.0397338234,-1.3596266102,-2.3379331564

H,0,2.1748797029,0.0321157571,2.1833216639

H,0,2.1499533298,-0.0175395414,-0.2968596871

H,0,-2.1504951186,0.0763035412,-0.2820656284

H,0,-2.1562359235,0.1266256371,2.1981942511

H,0,-0.8166932701,-0.3213371155,4.2038712662

H,0,0.8375673196,-0.3462944087,4.1975834025

H,0,0.0319758107,1.1018605139,4.1578439592

Radical

1. H

Charge = 1 Multiplicity = 2

C,0,-1.2352583202,0.0380583693,-1.1489624086

C,0,-1.2445454222,-0.008120607,0.2242809307

C,0,0.0034416057,-0.0315455515,0.9352622205

C,0,1.2461611865,-0.0069658502,0.2151678175

C,0,1.2267693854,0.0393544093,-1.1579644981

C,0,-0.0068128608,0.0623667787,-1.8516173747

N,0,0.0083536894,-0.0760226811,2.2709237767

H,0,2.1825725367,-0.0253470343,0.7653119298

H,0,2.1580267063,0.0581985169,-1.7142979514

H,0,-0.0107976397,0.0990759987,-2.9365521574

H,0,-2.1705846225,0.0562002994,-1.6984510691

H,0,-2.1768867692,-0.0280571137,0.781239653

H,0,-0.8536605568,-0.0935382898,2.8078332668

H,0,0.8743210736,-0.0932589008,2.8014497676

1. CH3

Charge = 1 Multiplicity = 2

C,0,-1.2063512948,0.0184595973,-0.6825835934

C,0,-1.175161937,0.0130053545,0.7418428432

C,0,0.0107077022,-0.0003171069,1.4300218728

C,0,1.2487860496,-0.0071731409,0.7065852308

C,0,1.2313383908,-0.000492788,-0.7272539666

C,0,0.0307326633,0.0128445052,-1.3893923855

N,0,2.4130493766,-0.0179071303,1.3653501903

C,0,-2.5062768524,0.000204177,-1.4180952134

H,0,2.1704969254,-0.003030411,-1.2731222907

H,0,0.0169392416,0.0203656849,-2.4750234042

H,0,-2.1128719858,0.0206456876,1.289094776

H,0,0.0264320066,-0.0027671094,2.5161822221

H,0,2.4517029274,-0.0224288439,2.3793822196

H,0,3.3021866874,-0.0226591283,0.876281914

H,0,-2.4262475435,0.4786265717,-2.3985051222

H,0,-2.8173665687,-1.041954999,-1.5935694056

H,0,-3.3052656577,0.4793688696,-0.8449209691

1. NO2

Charge = 1 Multiplicity = 2

C,0,-0.598586785,0.0116364451,-0.3397195891

C,0,-0.6268403521,-0.0001491714,1.0691736383

C,0,0.563290388,-0.0235640927,1.7544261903

C,0,1.8023271349,-0.0355182951,1.0228792828

C,0,1.795076192,-0.0226498554,-0.4159751098

C,0,0.5965127496,0.0005561373,-1.0863804156

N,0,2.9619449746,-0.0579782889,1.680992405

N,0,-1.8908705699,0.0371031412,-1.0731315611

O,0,-2.9052246708,0.046362631,-0.3876585632

O,0,-1.8224901146,0.0464265789,-2.2954658417

H,0,2.7363012013,-0.0322296236,-0.9577557394

H,0,0.5443453683,0.0112855643,-2.1688427977

H,0,-1.5829446576,0.0093720176,1.5794053932

H,0,0.5807604329,-0.0334007592,2.8402997114

H,0,3.0008522431,-0.0662186785,2.6970617834

H,0,3.8542068981,-0.0668631733,1.1933769994

1. CN

Charge = 1 Multiplicity = 2

C,0,-1.2385678977,0.0068746884,-0.3787334763

C,0,-1.2445212014,-0.0208173992,0.9904525812

C,0,0.0003400955,-0.0347978148,1.7081101135

C,0,1.2449139511,-0.0189583112,0.9900038822

C,0,1.2384194221,0.0086161491,-0.3791836048

C,0,-0.0002101636,0.0220248706,-1.0872175305

N,0,0.0005888323,-0.061496301,3.0413930227

C,0,-0.000494153,0.0505041475,-2.5031366274

N,0,-0.0007238802,0.0741079925,-3.6705477033

H,0,2.1808851168,-0.0295651327,1.5406719147

H,0,2.1690005232,0.0206342827,-0.9362642115

H,0,-2.1693654522,0.017477142,-0.9354784182

H,0,-2.1802747202,-0.0333809543,1.5414492129

H,0,-0.8630950876,-0.0721778703,3.576155833

H,0,0.8645146365,-0.0719472894,3.575776406

1. NH2

Charge = 1 Multiplicity = 2

C,0,-1.2103457255,0.0110261993,-0.7218668356

C,0,-1.2183675375,0.0056647476,0.7075947091

C,0,-0.0435453204,-0.0050823009,1.40828087

C,0,1.2103340991,-0.0111874578,0.7218597503

C,0,1.2183824095,-0.0055804906,-0.707590504

C,0,0.0435544622,0.0051663865,-1.4082687657

N,0,2.3649539143,-0.0213560293,1.410486768

H,0,2.3794658122,-0.0261848847,2.4227495904

N,0,-2.364961553,0.021461398,-1.4104919715

H,0,3.2624894616,-0.0264676601,0.9421768894

H,0,2.1674819296,-0.0099398548,-1.2354346079

H,0,0.0569659468,0.0093482127,-2.4941935796

H,0,-2.1674501474,0.0101882862,1.2354697016

H,0,-0.0569164858,-0.0090736538,2.4942059218

H,0,-3.262547863,0.025966738,-0.9422006855

H,0,-2.379509508,0.0253827307,-2.4227921498

1. N(CH3)2

Charge = 1 Multiplicity = 2

C,0,-1.2282240448,-0.0547808446,-1.4708280687

C,0,-1.2256424037,-0.01813358,-0.1015889682

C,0,0.0017394042,0.016635138,0.6372638333

C,0,1.2252934352,0.0118963596,-0.108713457

C,0,1.2207507136,-0.0246840375,-1.4779506844

C,0,-0.0056197407,-0.0591944696,-2.2033844426

N,0,0.0050949284,0.052893962,1.9926742647

C,0,1.2686206832,0.0871065735,2.7415706726

N,0,-0.0090632156,-0.0953003199,-3.5496112548

C,0,-1.2548649431,0.0613634623,2.7482707842

H,0,2.1770216354,0.037846074,0.4061285004

H,0,2.1615778462,-0.0272651959,-2.0206508589

H,0,-2.1718579889,-0.0809602443,-2.0080015822

H,0,-2.1746386539,-0.0163368765,0.4189030686

H,0,-0.8721400274,-0.1188414378,-4.0766795988

H,0,0.8512771358,-0.0977094475,-4.0816496504

H,0,-1.0302002494,0.0962163695,3.8125499317

H,0,-1.8551763459,0.9401414438,2.491145106

H,0,-1.8344703813,-0.84512842,2.5452213928

H,0,1.0490676921,0.1066807531,3.8072968963

H,0,1.8700904535,-0.8023060792,2.5273906175

H,0,1.8449082704,0.9832559558,2.4890670909

1. F

Charge = 1 Multiplicity = 2

C,0,-1.2139672879,-0.0002858098,-0.6862728606

C,0,-1.2346704616,-0.0000254539,0.7264182367

C,0,-0.0425877341,0.0002364353,1.4044457978

C,0,1.1947477717,0.0002934723,0.6752546196

C,0,1.1809415575,0.0000388566,-0.7608133151

C,0,-0.0147431385,-0.0003221851,-1.4327280261

N,0,2.3594596936,0.000518539,1.333340286

H,0,2.1203651304,0.0000248974,-1.3056542061

H,0,-0.063495539,-0.0005181064,-2.5162757642

H,0,-2.1883875128,-0.0000353823,1.2430529969

H,0,-0.0246393713,0.0004801009,2.4902628834

H,0,2.3996178214,0.0007873566,2.347677449

H,0,3.2490491426,0.0006103942,0.8443685578

F,0,-2.3585613076,-0.0005101029,-1.332737848

1. Cl

Charge = 1 Multiplicity = 2

C,0,-1.2351952685,0.0072366546,-0.2830912921

C,0,-1.2425333925,-0.0348185845,1.087196041

C,0,-0.0033984352,-0.0555534912,1.8092257587

C,0,1.2384405071,-0.0325945237,1.0919246029

C,0,1.2362502182,0.0094522211,-0.2783809059

C,0,0.0018401486,0.0299111262,-0.9796016652

N,0,-0.0059097037,-0.0960486211,3.1459254858

Cl,0,0.005045212,0.0826150312,-2.6859281775

H,0,2.1751263109,-0.0487521527,1.6413913598

H,0,2.1671654706,0.0273131532,-0.8346028439

H,0,-2.164014099,0.0234305287,-0.8428576606

H,0,-2.1812763609,-0.0526572216,1.6330884377

H,0,-0.8701855036,-0.1123987772,3.6776777438

H,0,0.8563608373,-0.1108511278,3.6809683442

1. COCH3

Charge = 1 Multiplicity = 2

C,0,-1.2533171503,0.0043179431,0.0505790571

C,0,-1.2763564648,-0.0149731666,1.4191473381

C,0,-0.0367999248,-0.0308600613,2.1436632559

C,0,1.2114798245,-0.0264347703,1.4302657541

C,0,1.205972345,-0.0064883113,0.0570939862

C,0,-0.0190799731,0.0104156059,-0.6605768734

N,0,-0.039921053,-0.0494695797,3.4780245193

C,0,-0.091345371,0.0306542842,-2.1739812271

O,0,-1.1987473674,0.0244657945,-2.6829324252

C,0,1.1825988589,0.0547204589,-2.9811579966

H,0,2.1442243512,-0.0387860288,1.9869022307

H,0,2.1491846822,-0.003218659,-0.4780512175

H,0,-2.1695864808,0.0158864219,-0.5300363548

H,0,-2.2149707699,-0.0182986779,1.9660880344

H,0,-0.9063015056,-0.0535457493,4.008290944

H,0,0.8217428283,-0.0609517306,4.0154837495

H,0,1.7961369355,-0.8318232259,-2.7783640477

H,0,0.9241573523,0.0738672827,-4.0406245784

H,0,1.78592605,0.9393191731,-2.7426007597

1. OCH3

Charge = 1 Multiplicity = 2

C,0,-1.3903629702,0.0206553965,-1.1085265878

C,0,-1.3725305117,-0.0107212533,0.2568135907

C,0,-0.1308165301,-0.0227231484,0.9644121253

C,0,1.0974648277,-0.0016456857,0.2453820242

C,0,1.0808905976,0.029958967,-1.1262843153

C,0,-0.1595238805,0.0419472651,-1.8401918996

O,0,-0.2356631358,-0.0534495118,2.280116042

C,0,0.9346619686,-0.0690704681,3.1295363954

N,0,-0.1668924504,0.0728258464,-3.1816241348

H,0,2.0447719753,-0.0103319551,0.7707429432

H,0,2.0140761184,0.0462391267,-1.6818034412

H,0,-2.3334477695,0.0299758379,-1.6469458588

H,0,-2.2892219254,-0.027478558,0.8364502533

H,0,-1.0329487846,0.0810825156,-3.7077490198

H,0,0.6921477686,0.0877410522,-3.7187986534

H,0,0.5438479051,-0.0944075383,4.1449248352

H,0,1.531188117,-0.9639320552,2.9321973595

H,0,1.524437826,0.8385203046,2.974574193

1. CONH2

Charge = 1 Multiplicity = 2

C,0,-1.2309593081,-0.0873915507,0.0163558737

C,0,-1.2602146282,-0.1226551461,1.3856119745

C,0,-0.033657919,-0.0498346379,2.1208669743

C,0,1.2138547571,0.0596771877,1.4186875882

C,0,1.2217780793,0.0844835257,0.0448009412

C,0,0.0082335279,-0.0253202918,-0.6797390273

N,0,-0.0451220257,-0.0746416839,3.4583314152

C,0,-0.0452202399,0.0821459373,-2.1748645651

O,0,-0.9354605055,0.7996123965,-2.6274101149

N,0,0.9042314906,-0.5289999688,-2.9103612294

H,0,2.1398931141,0.1260796619,1.9825691337

H,0,2.1616618083,0.1912077207,-0.4875421594

H,0,-2.1485077488,-0.110826423,-0.5610665721

H,0,-2.2017189573,-0.1976696974,1.9217140153

H,0,-0.9125830023,-0.1368907652,3.980962784

H,0,0.8099507621,-0.0178395375,4.0012005824

H,0,1.5126953471,-1.238433872,-2.5261083628

H,0,0.8656408519,-0.433664836,-3.9185583588

1. CF3

Charge = 1 Multiplicity = 2

C,0,-1.2267335163,0.0481634565,0.323520051

C,0,-1.2360742634,0.0174921512,1.6958116156

C,0,0.0101981755,-0.0158294297,2.4096616168

C,0,1.252703633,-0.0133058199,1.6886393484

C,0,1.2366968436,0.017165399,0.3158039565

C,0,0.0035794074,0.0445580878,-0.3777868098

N,0,0.0139131516,-0.0471509331,3.7442973231

C,0,-0.0071120727,0.0104777637,-1.8977999563

F,0,-1.0562965956,0.6932476413,-2.3768259216

F,0,1.1194712266,0.5383107849,-2.3949495561

F,0,-0.1025255507,-1.2640778463,-2.3088005087

H,0,2.190393618,-0.0341480362,2.2363092715

H,0,2.1653217916,0.0252952574,-0.2439675891

H,0,-2.1584608737,0.0802195899,-0.2306297036

H,0,-2.170823717,0.0197822504,2.2488442213

H,0,-0.8487424883,-0.0497385334,4.2813802732

H,0,0.8795286434,-0.0710088669,4.27606721
